# Supplementary material
Source: publisher site journal article supplement (https://www.dovepress.com/get_supplementary_file.php?f=215473.docx)
Supplement: Supplementary file 1 [file get_supplementary_file.php]

**Supplementary Figures**


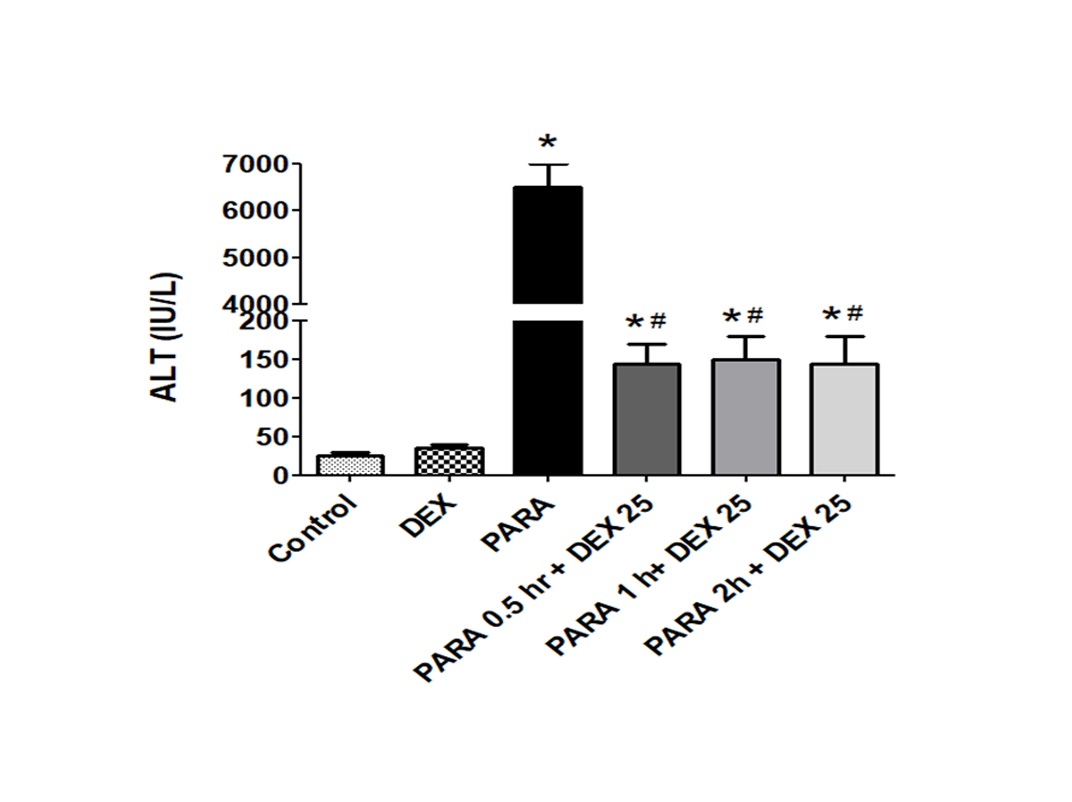


**Supplemental Figure 1** Effect of DEX administration 1-2 hrs after PARA exposure.

Mice were intraperitoneally administered PARA (300 mg/kg) and DEX (25 μg/kg) was given 0.5, 1, and 2 hrs after injection of PARA. Then mice were sacrificed 16 hrs later for assessment of serum ALT levels. Results are presented as the mean ± SEM; n = 6 mice per group. **p* < 0.05 vs. control; #*p* < 0.05 vs. PARA alone.


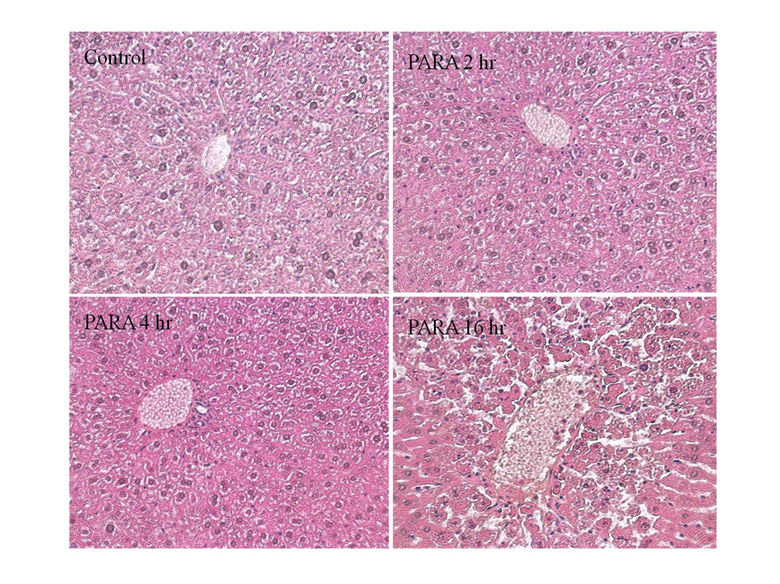


**Supplemental Figure 2** Effect of PARA-induced liver toxicity-related histology for early time points compared to late time point. Mice were intraperitoneally administered saline (control), PARA (300 mg/kg) and were sacrificed 2, 4, and 16 hrs later for H&E staining (200x). Typical images were chosen from each group.


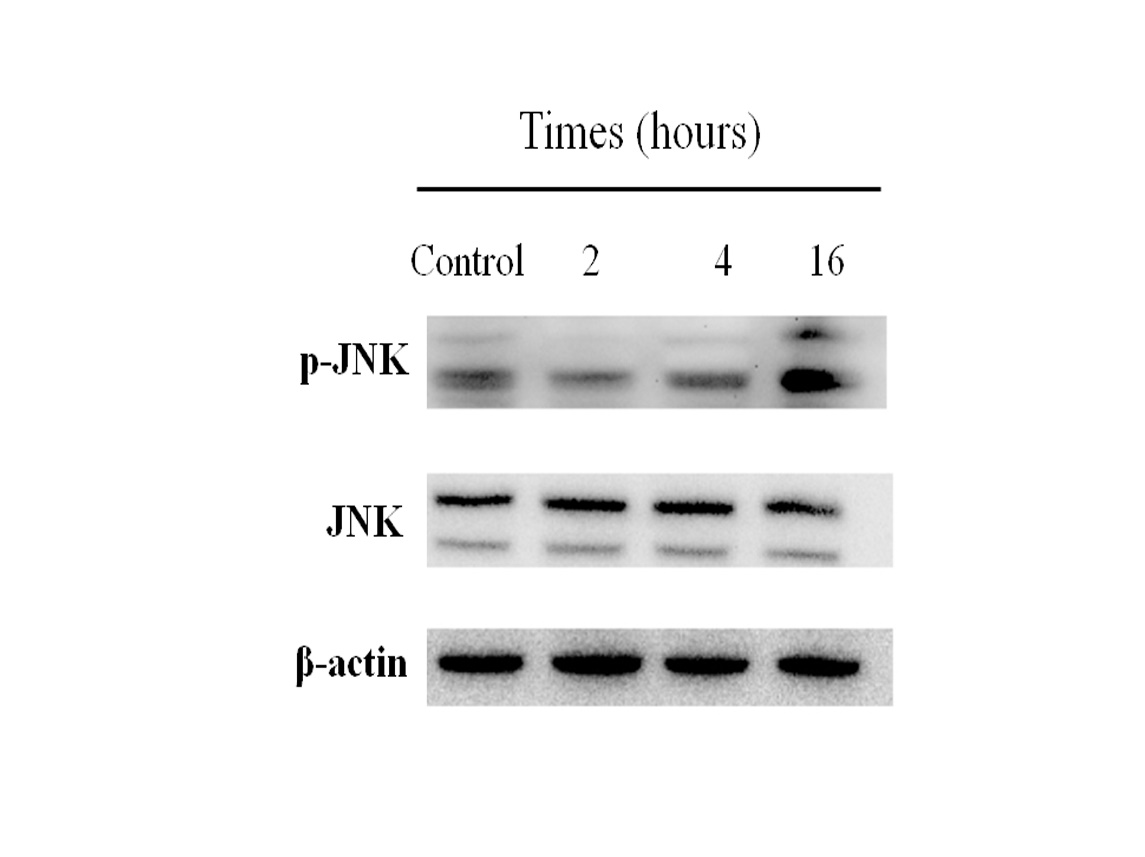


# Supplemental Figure 3 Western blot analysis of phosphorylated JNK protein expression in early time points PARA-induced liver toxicity compared to late time point. Mice were intraperitoneally administered saline (control), PARA (300 mg/kg) and were sacrificed 2, 4, and 16 hrs later for JNK and p-JNK protein expression. Blots were reprobed for β-actin to ensure equal protein loading in all lanes.
